# Supplementary material
Source: MDPI journal article supplement (https://www.mdpi.com/2226-4310/8/12/388)
Supplement: s1 [file s1]

## Supplementary Materials

# Comparison of the Aircraft Noise Calculation Programs sonAIR, FLULA2 and AEDT with Noise Measurements of Single Flights

Jonas Meister \*, Stefan Schalcher, Jean-Marc Wunderli, David Jäger, Christoph Zellmann † and Beat Schäffer

Laboratory for Acoustics / Noise Control, Empa, Swiss Federal Laboratories for Materials Science and Technology, 8600 Dübendorf, Switzerland; stefan.schalcher@empa.ch (S.S.); jean-marc.wunderli@empa.ch (J.-M.W.); david\_jaeger@gmx.ch (D.J.); christoph.zellmann@n-sphere.ch (C.Z.); beat.schaeffer@empa.ch (B.S.)

\* Correspondence: jonas.meister@empa.ch; Tel.: +41-58-765-42-46

† Present address: n-Sphere AG, 8045 Zurich, Switzerland.

**Table S1.** List of aircraft types simulated with AEDT, their emission models and corresponding level corrections.

| Type | Engine Type   | AEDT Emission Model                      | Correction Departure | Correction Approach |
|------|---------------|------------------------------------------|----------------------|---------------------|
| A319 | CFM56-5A      | A319-131 \ IAE V2522-A5                  | 1.9                  | 0.3                 |
| A319 | CFM56-5B      | A319-131 \ IAE V2522-A5                  | 0.75                 | −0.6                |
| A319 | V2500         | A319-131 \ IAE V2522-A5                  | −0.15                | 0.1                 |
| A320 | V2500         | A320-232 \ V2527-A5                      | 0.15                 | 0.2                 |
| A320 | CFM56-5A      | A320-211 \ CFM56-5A1                     | 0.05                 | −0.1                |
| A320 | CFM56-5B      | A320-211 \ CFM56-5A1                     | −1.0                 | −0.7                |
| A321 | CFM56-5B      | A321-232 \ V2530-A5                      | 1.8                  | 1.3                 |
| A321 | V2500         | A321-232 \ V2530-A5                      | 0.1                  | 0.0                 |
| A333 | TRENT7        | A330-343 \ RR TRENT 772B                 | −0.3                 | 0.1                 |
| A343 | CFM56-5C      | A340-211 \ CFM56-5C2                     | 0.7                  | −0.2                |
| A388 | GP7270        | A380-861 \ EA GP7270                     | 0.0                  | 0.0                 |
| A388 | TRENT9        | A380-841 \ RR trent970                   | −0.05                | 0.0                 |
| B733 | CFM56-3       | BOEING 737-300/CFM56-3B-1                | 0.45                 | −0.3                |
| B734 | CFM56-3       | BOEING 737-400/CFM56-3C-1                | −0.05                | 0.0                 |
| B735 | CFM56-3       | BOEING 737-500/CFM56-3C-1                | 0.0                  | 0.4                 |
| B736 | CFM56-7B      | BOEING 737-700/CFM56-7B24                | −2.1                 | −0.3                |
| B737 | CFM56-7B      | BOEING 737-700/CFM56-7B24                | 0.2                  | 0.0                 |
| B738 | CFM56-7B      | BOEING 737-800/CFM56-7B26                | 0.05                 | 0.1                 |
| B739 | CFM56-7B      | BOEING 737-800/CFM56-7B26                | 0.95                 | 0.0                 |
| B762 | CF6-80C2      | BOEING 767-200/CF6-80A                   | −0.85                | −5.1                |
| B763 | CF6-80C2      | BOEING 767-300/CF6-80A                   | −0.05                | −3.1                |
| B763 | PW4060        | BOEING 767-300/CF6-80A                   | 0.0                  | −3.1                |
| B764 | CF6-80C2      | BOEING 767-300/CF6-80A                   | 0.35                 | −3.0                |
| B77W | GE90-115B     | Boeing 777-300ER/GE90-115B-EIS           | −0.25                | −0.2                |
| CRJ7 | CF34-80C5     | CL-600-2D15/CL-600-2D24/CF34-8C5         | 0.0                  | 0.0                 |
| CRJ9 | CF34-80C5     | CL-600-2D15/CL-600-2D24/CF34-8C5         | 5.0                  | 0.0                 |
| CRJX | CF34-80C5     | CL-600-2D15/CL-600-2D24/CF34-8C5         | 0.7                  | 0.7                 |
| E170 | CF34-8E       | ERJ170-100                               | −0.1                 | 0.5                 |
| E190 | E190_CF34-10E | ERJ190-100                               | 0.0                  | 0.0                 |
| E195 | E190_CF34-10E | ERJ190-200                               | 0.0                  | 0.0                 |
| F100 | TAY650-15     | F100/TAY 650-15                          | 0.0                  | 0.0                 |
| FA7X | PW307         | GULFSTREAM GIV-SP/TAY 611-8              | 1.8                  | −2.2                |
| B788 | Genx-1B       | Boeing 787-8/T1000-C/01 Family Plan Cert | 1.05                 | 2.0                 |
| B789 | Genx-1B       | Boeing 787-8/T1000-C/01 Family Plan Cert | 2.35                 | 1.4                 |

**Table S2.** Aircraft and engine specific differences and standard deviations to measurements with FDR data in the close range (ZRH and GVA combined), separated for departures (D) and approaches (A). N: number of noise events, SD: standard deviation.

| Type<br>(ICAO) | sonAIR         | FLULA2     | AEDT                           | Procedure | N     | sonAIR<br>Mean | sonAIR<br>SD | FLULA2<br>Mean | FLULA2<br>SD | AEDT<br>Mean | AEDT<br>SD |     |
|----------------|----------------|------------|--------------------------------|-----------|-------|----------------|--------------|----------------|--------------|--------------|------------|-----|
| A319           | A319 CFM56-5B  | RCLAPA319  | A319-131\IAE V2522-A5          | A         | 245   | -0.2           | 1.9          | -0.1           | 2.1          | -2.4         | 2.5        |     |
| A319           | A319 CFM56-5B  | RCSVGA319  | A319-131\IAE V2522-A5          | D         | 258   | -1.0           | 1.3          | -0.5           | 1.4          | -1.5         | 1.7        |     |
| A320           | A320 CFM56-5B  | RCLAPA320  | A320-211\CFM56-5A1             | A         | 251   | -0.3           | 1.5          | -0.3           | 1.9          | -0.8         | 1.8        |     |
| A320           | A320 CFM56-5B  | RCSVGA320  | A320-211\CFM56-5A1             | D         | 255   | -0.6           | 1.3          | -0.5           | 1.4          | -1.7         | 1.7        |     |
| A321           | A321 CFM56-5B  | RCLAPA321  | A321-232\V2530-A5              | A         | 276   | 0.3            | 1.3          | 0.4            | 1.7          | 1.2          | 1.8        |     |
| A321           | A321 CFM56-5B  | RCSVGA321  | A321-232\V2530-A5              | D         | 279   | -0.7           | 1.5          | -0.2           | 1.7          | 0.0          | 2.2        |     |
| A333           | A333 TRENT7    | RCLAPA3303 | A330-343\RR TRENT 772B         | A         | 195   | -0.2           | 1.7          | -0.4           | 1.7          | 0.8          | 1.9        |     |
| A333           | A333 TRENT7    | RCSVGA3303 | A330-343\RR TRENT 772B         | D         | 181   | -1.1           | 1.3          | -2.3           | 1.8          | -3.0         | 2.0        |     |
| A343           | A343 CFM56-5C  | RCLAPA3403 | A340-211\CFM56-5C2             | A         | 197   | 0.3            | 1.3          | 0.4            | 1.7          | 1.4          | 1.6        |     |
| A343           | A343 CFM56-5C  | RCSVGA3403 | A340-211\CFM56-5C2             | D         | 249   | -0.5           | 1.9          | -0.1           | 1.7          | -2.5         | 2.2        |     |
| B77W           | B77W GE90-115B | RCLAPB7773 | Boeing 777-300ER/GE90-115B-EIS | A         | 272   | -0.6           | 1.3          | -0.9           | 1.8          | 1.4          | 1.9        |     |
| B77W           | B77W GE90-115B | RCSVGB7773 | Boeing 777-300ER/GE90-115B-EIS | D         | 320   | 0.4            | 1.4          | 0.8            | 2.4          | -1.5         | 2.6        |     |
| BCS1           | BCS1 PW1500G   | RCLAPBCS1  | Boeing 737-700/CFM56-7B24      | A         | 229   | -0.4           | 1.6          | -1.4           | 2.0          | 0.4          | 1.8        |     |
| BCS1           | BCS1 PW1500G   | RCSVGBCS1  | Boeing 737-700/CFM56-7B24      | D         | 312   | 0.1            | 1.5          | 0.0            | 1.9          | 0.2          | 2.0        |     |
| BCS3           | BCS3 PW1500G   | RCLAPBCS3  | Boeing 737-700/CFM56-7B24      | A         | 225   | -0.2           | 1.8          | -1.0           | 1.9          | 0.8          | 1.7        |     |
| BCS3           | BCS3 PW1500G   | RCSVGBCS3  | Boeing 737-700/CFM56-7B24      | D         | 292   | -0.6           | 1.5          | -0.3           | 1.8          | 1.1          | 2.1        |     |
|                |                |            |                                |           | A     | 1890           | -0.2         | 1.6            | -0.4         | 1.9          | 0.3        | 2.3 |
|                |                |            |                                |           | D     | 2146           | -0.4         | 1.5            | -0.3         | 2.0          | -1.0       | 2.5 |
|                |                |            |                                |           | Total | 4036           | -0.3         | 1.6            | -0.3         | 2.0          | -0.4       | 2.5 |

**Table S3.** Aircraft and engine specific differences and standard deviations to measurements without FDR data in the close range (ZRH and GVA combined), separated for departures (D) and approaches (A). N: number of noise events, SD: standard deviation.

| Type  | sonAIR         | FLULA2     | AEDT                             | Procedure | N     | sonAIR<br>Mean | sonAIR<br>SD | FLULA2<br>Mean | FLULA2<br>SD | AEDT<br>Mean | AEDT<br>SD |     |
|-------|----------------|------------|----------------------------------|-----------|-------|----------------|--------------|----------------|--------------|--------------|------------|-----|
| A319  | A319 CFM56-5B  | RCLAPA319  | A319-131\IAE V2522-A5            | A         | 365   | 1.7            | 1.5          | 1.7            | 1.8          | 0.1          | 1.9        |     |
| A319  | A319 CFM56-5B  | RCSVGA319  | A319-131\IAE V2522-A5            | D         | 526   | 0.5            | 1.7          | 0.7            | 1.7          | -0.9         | 2.0        |     |
| A319  | A32X_CFM56-5A  | RCLAPA319  | A319-131\IAE V2522-A5            | A         | 141   | -0.6           | 1.4          | 2.1            | 1.8          | 0.4          | 2.1        |     |
| A319  | A32X_CFM56-5A  | RCSVGA319  | A319-131\IAE V2522-A5            | D         | 226   | -0.1           | 1.4          | -0.2           | 1.6          | 0.0          | 1.6        |     |
| A319  | A32X_V2500     | RCLAPA319  | A319-131\IAE V2522-A5            | A         | 344   | 1.3            | 1.9          | 3.4            | 2.0          | 2.7          | 1.9        |     |
| A319  | A32X_V2500     | RCSVGA319  | A319-131\IAE V2522-A5            | D         | 321   | 0.2            | 1.3          | 1.3            | 1.5          | -1.0         | 1.7        |     |
| A320  | A320 CFM56-5B  | RCLAPA320  | A320-211\CFM56-5A1               | A         | 378   | 0.7            | 1.8          | 0.7            | 1.9          | 0.3          | 1.7        |     |
| A320  | A320 CFM56-5B  | RCSVGA320  | A320-211\CFM56-5A1               | D         | 576   | 0.1            | 1.8          | 0.1            | 1.9          | -1.5         | 2.1        |     |
| A320  | A32X_CFM56-5A  | RCLAPA320  | A320-211\CFM56-5A1               | A         | 243   | -0.8           | 1.6          | 0.9            | 1.6          | 0.6          | 1.6        |     |
| A320  | A32X_CFM56-5A  | RCSVGA320  | A320-211\CFM56-5A1               | D         | 300   | -0.8           | 1.3          | -0.5           | 1.6          | -0.9         | 1.7        |     |
| A320  | A32X_V2500     | RCLAPA320  | A320-232\V2527-A5                | A         | 355   | 0.7            | 1.7          | 2.0            | 1.8          | 2.6          | 1.9        |     |
| A320  | A32X_V2500     | RCSVGA320  | A320-232\V2527-A5                | D         | 320   | -0.7           | 1.8          | 0.4            | 1.8          | 0.2          | 1.8        |     |
| A321  | A321 CFM56-5B  | RCLAPA321  | A321-232\V2530-A5                | A         | 314   | 0.3            | 1.9          | 0.6            | 1.9          | 1.4          | 2.2        |     |
| A321  | A321 CFM56-5B  | RCSVGA321  | A321-232\V2530-A5                | D         | 424   | -0.7           | 1.6          | -0.4           | 2.0          | -0.5         | 2.2        |     |
| A321  | A32X_V2500     | RCLAPA321  | A321-232\V2530-A5                | A         | 305   | 0.7            | 1.9          | 2.0            | 2.0          | 1.4          | 2.0        |     |
| A321  | A32X_V2500     | RCSVGA321  | A321-232\V2530-A5                | D         | 330   | -3.0           | 1.5          | -0.7           | 1.7          | -1.8         | 2.1        |     |
| A333  | A333 TRENT7    | RCLAPA3303 | A330-343\RR TRENT 772B           | A         | 191   | -0.4           | 2.1          | -0.5           | 1.6          | 0.9          | 1.6        |     |
| A333  | A333 TRENT7    | RCSVGA3303 | A330-343\RR TRENT 772B           | D         | 290   | -1.5           | 2.2          | -1.6           | 2.3          | -2.8         | 2.3        |     |
| A343  | A343 CFM56-5C  | RCLAPA3403 | A340-211\CFM56-5C2               | A         | 119   | 0.3            | 1.9          | 0.5            | 1.8          | 1.1          | 1.9        |     |
| A343  | A343 CFM56-5C  | RCSVGA3403 | A340-211\CFM56-5C2               | D         | 201   | -0.1           | 1.6          | 0.1            | 1.6          | -1.7         | 2.0        |     |
| A388  | A388_GP7270    | RCLAPA380  | A380-861\EA GP7270               | A         | 168   | 3.7            | 2.8          | 2.0            | 2.0          | 0.3          | 2.3        |     |
| A388  | A388_GP7270    | RCSVGA380  | A380-861\EA GP7270               | D         | 157   | -1.0           | 1.9          | 1.2            | 1.8          | -0.1         | 2.3        |     |
| A388  | A388_TRENT9    | RCLAPA380  | A380-841\RR trent970             | A         | 127   | -0.4           | 2.9          | -1.2           | 2.9          | -2.2         | 2.3        |     |
| A388  | A388_TRENT9    | RCSVGA380  | A380-841\RR trent970             | D         | 58    | -0.6           | 1.1          | 0.1            | 1.0          | -0.7         | 1.1        |     |
| B733  | B737_CFM56-3   | RCLAPB7373 | BOEING 737-300/CFM56-3B-1        | A         | 134   | -1.2           | 1.5          | -1.0           | 1.5          | -1.3         | 1.6        |     |
| B733  | B737_CFM56-3   | RCSVGB7373 | BOEING 737-300/CFM56-3B-1        | D         | 267   | -0.2           | 1.9          | 0.0            | 2.0          | 0.1          | 2.2        |     |
| B734  | B737_CFM56-3   | RCLAPB7374 | BOEING 737-400/CFM56-3C-1        | A         | 259   | -1.5           | 1.4          | -2.3           | 1.3          | -2.1         | 1.6        |     |
| B734  | B737_CFM56-3   | RCSVGB7374 | BOEING 737-400/CFM56-3C-1        | D         | 190   | -0.6           | 1.9          | 0.2            | 1.8          | -0.5         | 1.8        |     |
| B735  | B737_CFM56-3   | RCLAPB7375 | BOEING 737-500/CFM56-3C-1        | A         | 210   | -1.4           | 1.4          | -1.7           | 1.2          | -0.9         | 1.6        |     |
| B735  | B737_CFM56-3   | RCSVGB7375 | BOEING 737-500/CFM56-3C-1        | D         | 332   | -0.9           | 1.4          | -0.9           | 1.7          | -0.8         | 1.5        |     |
| B736  | B737_CFM56-7B  | RCLAPB7376 | BOEING 737-700/CFM56-7B24        | A         | 224   | -1.2           | 2.0          | -0.7           | 2.3          | 1.0          | 2.5        |     |
| B736  | B737_CFM56-7B  | RCSVGB7376 | BOEING 737-700/CFM56-7B24        | D         | 246   | 1.1            | 2.0          | 0.1            | 1.8          | -0.7         | 1.6        |     |
| B737  | B737_CFM56-7B  | RCLAPB7377 | BOEING 737-700/CFM56-7B24        | A         | 254   | -0.9           | 1.6          | -0.4           | 1.4          | 1.4          | 1.6        |     |
| B737  | B737_CFM56-7B  | RCSVGB7377 | BOEING 737-700/CFM56-7B24        | D         | 263   | -0.4           | 1.9          | -0.6           | 2.0          | 0.3          | 2.1        |     |
| B738  | B737_CFM56-7B  | RCLAPB7378 | BOEING 737-800/CFM56-7B26        | A         | 246   | -1.5           | 1.8          | -1.0           | 1.6          | -0.2         | 1.7        |     |
| B738  | B737_CFM56-7B  | RCSVGB7378 | BOEING 737-800/CFM56-7B26        | D         | 312   | -1.2           | 2.1          | 0.2            | 2.1          | 1.0          | 2.7        |     |
| B739  | B737_CFM56-7B  | RCLAPB7378 | BOEING 737-800/CFM56-7B26        | A         | 210   | -2.2           | 1.6          | -1.6           | 1.4          | -1.1         | 1.6        |     |
| B739  | B737_CFM56-7B  | RCSVGB7378 | BOEING 737-800/CFM56-7B26        | D         | 209   | -2.2           | 2.0          | -0.8           | 2.3          | 0.2          | 2.7        |     |
| B762  | B76X_CF6-80C2  | RCLAPB7672 | BOEING 767-200/CF6-80A           | A         | 18    | 4.4            | 1.7          | 5.1            | 1.2          | -2.6         | 1.3        |     |
| B762  | B76X_CF6-80C2  | RCSVGB7672 | BOEING 767-200/CF6-80A           | D         | 10    | 2.6            | 1.3          | 2.5            | 2.4          | 0.6          | 1.7        |     |
| B763  | B763_PW4060    | RCLAPB7673 | BOEING 767-300/CF6-80A           | A         | 147   | -0.7           | 2.0          | -0.1           | 1.7          | -2.1         | 1.8        |     |
| B763  | B763_PW4060    | RCSVGB7673 | BOEING 767-300/CF6-80A           | D         | 252   | -1.0           | 2.5          | 1.1            | 2.5          | -0.1         | 3.2        |     |
| B763  | B76X_CF6-80C2  | RCLAPB7673 | BOEING 767-300/CF6-80A           | A         | 266   | 2.0            | 2.3          | -0.8           | 1.5          | -1.9         | 1.9        |     |
| B763  | B76X_CF6-80C2  | RCSVGB7673 | BOEING 767-300/CF6-80A           | D         | 229   | -0.8           | 2.2          | 2.0            | 2.5          | 1.1          | 2.7        |     |
| B764  | B76X_CF6-80C2  | RCLAPB7674 | BOEING 767-300/CF6-80A           | A         | 241   | 2.0            | 2.7          | 1.2            | 1.9          | -3.5         | 1.9        |     |
| B764  | B76X_CF6-80C2  | RCSVGB7674 | BOEING 767-300/CF6-80A           | D         | 215   | -1.3           | 2.3          | 0.4            | 2.8          | -1.7         | 3.5        |     |
| CRJ7  | CRJ9_CF34-8C5  | RCLAPCL90  | CL-600-2D15/CL-600-2D24/CF34-8C5 | A         | 189   | -0.5           | 1.4          | 0.0            | 1.6          | 0.9          | 1.6        |     |
| CRJ7  | CRJ9_CF34-8C5  | RCSVGCL90  | CL-600-2D15/CL-600-2D24/CF34-8C5 | D         | 338   | 0.3            | 1.7          | 1.5            | 2.0          | -2.8         | 1.8        |     |
| CRJ9  | CRJ9_CF34-8C5  | RCLAPCL90  | CL-600-2D15/CL-600-2D24/CF34-8C5 | A         | 301   | -0.8           | 1.7          | -0.5           | 2.0          | 0.6          | 2.2        |     |
| CRJ9  | CRJ9_CF34-8C5  | RCSVGCL90  | CL-600-2D15/CL-600-2D24/CF34-8C5 | D         | 236   | 0.1            | 1.9          | 1.5            | 2.3          | 0.4          | 3.6        |     |
| CRJX  | CRJ9_CF34-8C5  | RCLAPCL90  | CL-600-2D15/CL-600-2D24/CF34-8C5 | A         | 41    | -1.9           | 1.2          | -0.9           | 1.3          | 0.4          | 1.0        |     |
| CRJX  | CRJ9_CF34-8C5  | RCSVGCL90  | CL-600-2D15/CL-600-2D24/CF34-8C5 | D         | 68    | -0.5           | 1.3          | 1.3            | 1.9          | -2.0         | 1.9        |     |
| E170  | E170_CF34-8E   | RCLAPE170  | ERJ170-100                       | A         | 181   | -0.1           | 2.1          | -0.1           | 2.2          | 1.8          | 2.3        |     |
| E170  | E170_CF34-8E   | RCSVGE170  | ERJ170-100                       | D         | 186   | -0.1           | 1.7          | -0.5           | 1.8          | -1.8         | 1.7        |     |
| E190  | E190_CF34-10E  | RCLAPE190  | ERJ190-100                       | A         | 362   | -0.5           | 1.5          | -0.4           | 1.7          | 0.5          | 1.7        |     |
| E190  | E190_CF34-10E  | RCSVGE190  | ERJ190-100                       | D         | 476   | -1.0           | 1.6          | -0.4           | 1.8          | -1.4         | 1.8        |     |
| E195  | E190_CF34-10E  | RCLAPE190  | ERJ190-200                       | A         | 102   | -1.2           | 1.1          | -0.7           | 1.2          | -0.2         | 1.4        |     |
| E195  | E190_CF34-10E  | RCSVGE190  | ERJ190-200                       | D         | 102   | -0.9           | 1.4          | -0.6           | 1.8          | -2.0         | 1.5        |     |
| F100  | F100_TAY650-15 | RCLAPFK10  | F100/TAY 650-15                  | A         | 311   | 0.3            | 2.4          | 0.1            | 2.6          | 0.2          | 3.0        |     |
| F100  | F100_TAY650-15 | RCSVGFK10  | F100/TAY 650-15                  | D         | 449   | -1.5           | 1.7          | 0.9            | 2.0          | -1.8         | 2.4        |     |
| FA7X  | FA7X_PW307     | RCLAPFA7X  | GULFSTREAM GIV-SP/TAY 611-8      | A         | 179   | 0.3            | 1.9          | 0.7            | 1.8          | -3.5         | 2.3        |     |
| FA7X  | FA7X_PW307     | RCSVGFA7X  | GULFSTREAM GIV-SP/TAY 611-8      | D         | 213   | 0.3            | 2.8          | 0.0            | 3.3          | -3.7         | 3.2        |     |
|       |                |            |                                  |           | A     | 6925           | 0.1          | 2.3            | 0.3          | 2.3          | 0.2        | 2.5 |
|       |                |            |                                  |           | D     | 8322           | -0.6         | 2.0            | 0.2          | 2.2          | -0.9       | 2.5 |
| Total |                |            |                                  |           | 15247 | -0.3           | 2.2          | 0.2            | 2.2          | -0.4         | 2.5        |     |

**Table S4.** Aircraft and engine specific differences and standard deviations to measurements **with** FDR data in the **far range** (ZRH only), separated into departures (D) and approaches (A). N: number of noise events, SD: standard deviation.

| Type | sonAIR        | FLULA2     | AEDT                   | Procedure | N   | sonAIR<br>Mean | sonAIR<br>SD | FLULA2<br>Mean | FLULA2<br>SD | AEDT<br>Mean | AEDT<br>SD |
|------|---------------|------------|------------------------|-----------|-----|----------------|--------------|----------------|--------------|--------------|------------|
| A319 | A319 CFM56-5B | RCLAPA319  | A319-131\IAE V2522-A5  | A         | 97  | 0.1            | 1.3          | 0.0            | 1.7          | -2.7         | 1.6        |
| A320 | A320 CFM56-5B | RCLAPA320  | A320-211\CFM56-5A1     | A         | 176 | 0.5            | 1.3          | 0.4            | 2.3          | -0.1         | 2.1        |
| A321 | A321 CFM56-5B | RCLAPA321  | A321-232\V2530-A5      | A         | 170 | 0.6            | 1.2          | 0.9            | 1.8          | 0.5          | 1.7        |
| A333 | A333 TRENT7   | RCLAPA3303 | A330-343\RR TRENT 772B | A         | 86  | -0.1           | 1.3          | -4.3           | 2.0          | -1.0         | 2.1        |
| A343 | A343 CFM56-5C | RCLAPA3403 | A340-211\CFM56-5C2     | A         | 21  | 0.5            | 0.6          | -1.3           | 2.1          | 0.9          | 2.0        |
|      |               |            |                        | A         | 550 | 0.4            | 1.3          | -0.3           | 2.7          | -0.5         | 2.2        |
|      |               |            |                        | Total     | 550 | 0.4            | 1.3          | -0.3           | 2.7          | -0.5         | 2.2        |
